# Supplementary material
Source: publisher figshare collection journal article supplement (https://acs.figshare.com/ndownloader/files/9409348)
Supplement: Supplementary file 1 [file 9409348]

## Supporting Information

### **Light-controlled BMSC Sheet-Implant Complexes with Improved Osteogenesis via an LRP5/ $\beta$ -catenin/Runx2 Regulatory Loop**

*Zhiwei Jiang<sup>a</sup>, Huiming Wang<sup>b</sup>, Ke Yu<sup>a</sup>, Yuting Feng<sup>a</sup>, Ying Wang<sup>c</sup>, Tingben Huang<sup>a</sup>,  
Kaichen Lai<sup>a</sup>, Yue Xi<sup>a</sup>, Guoli Yang<sup>a,\*</sup>*

<sup>a</sup> Department of Implantology, Stomatology Hospital, School of Medicine, Zhejiang  
University, Yan'an Road, Hangzhou, P. R. China

<sup>b</sup> Department of Oral and Maxillofacial Surgery, Stomatology Hospital, School of  
Medicine, Zhejiang University, Yan'an Road, Hangzhou, P. R. China

<sup>c</sup> Department of Oral Medicine, Stomatology Hospital, School of Medicine, Zhejiang  
University, Yan'an Road, Hangzhou, P. R. China

\*Corresponding author: Guoli Yang

Email: guo\_li1977@aliyun.com

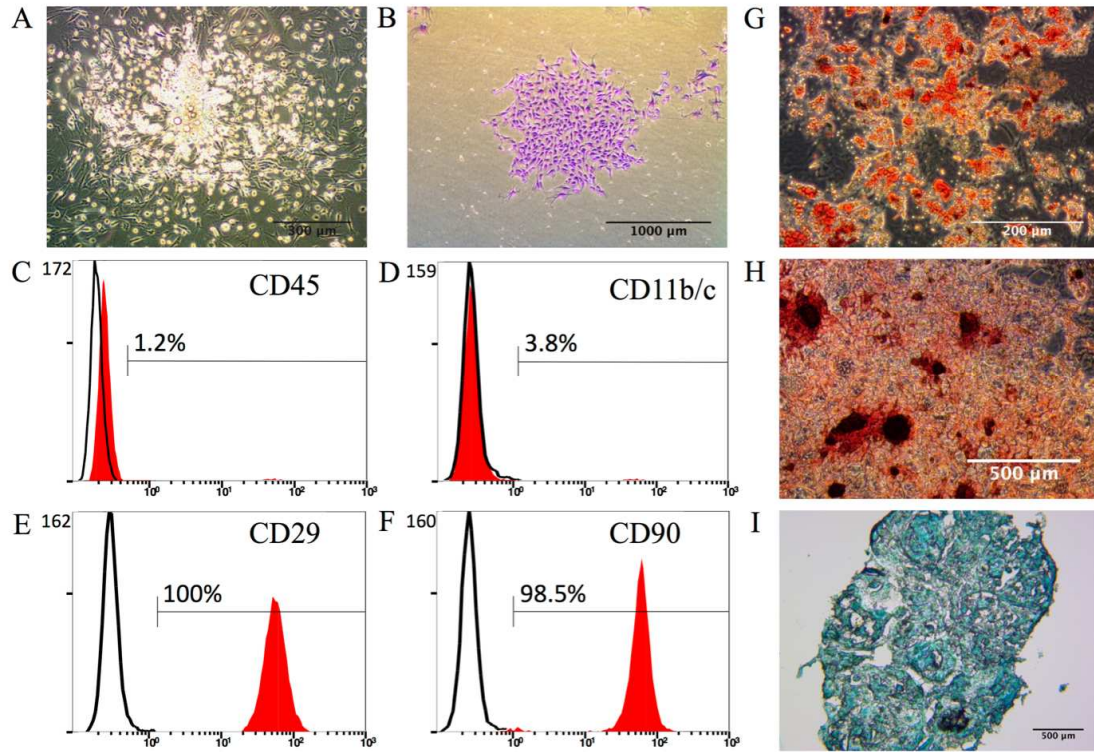

**Figure S1.** Characteristics of BMSCs. (A) A fibroblast-like morphology in primary BMSCs as observed under a phase contrast microscope. (B) Crystal violet staining of a CFU-F colony in BMSC culture at day 7. (C-F) Flow cytometry analysis of passage 3 BMSCs showing that BMSCs were negative for CD45 and CD11b/c, and positive for CD29 and CD90. (G) Oil Red O staining of BMSCs under adipogenic induction for 21 days. (H) Alizarin Red S staining of BMSCs under osteogenic induction for 21 days. (I) Alcian Blue staining of BMSCs under chondrogenic induction for 28 days. Scale bar: A: 100 µm; B: 1,000 µm; G: 200 µm; H, I: 500 µm.

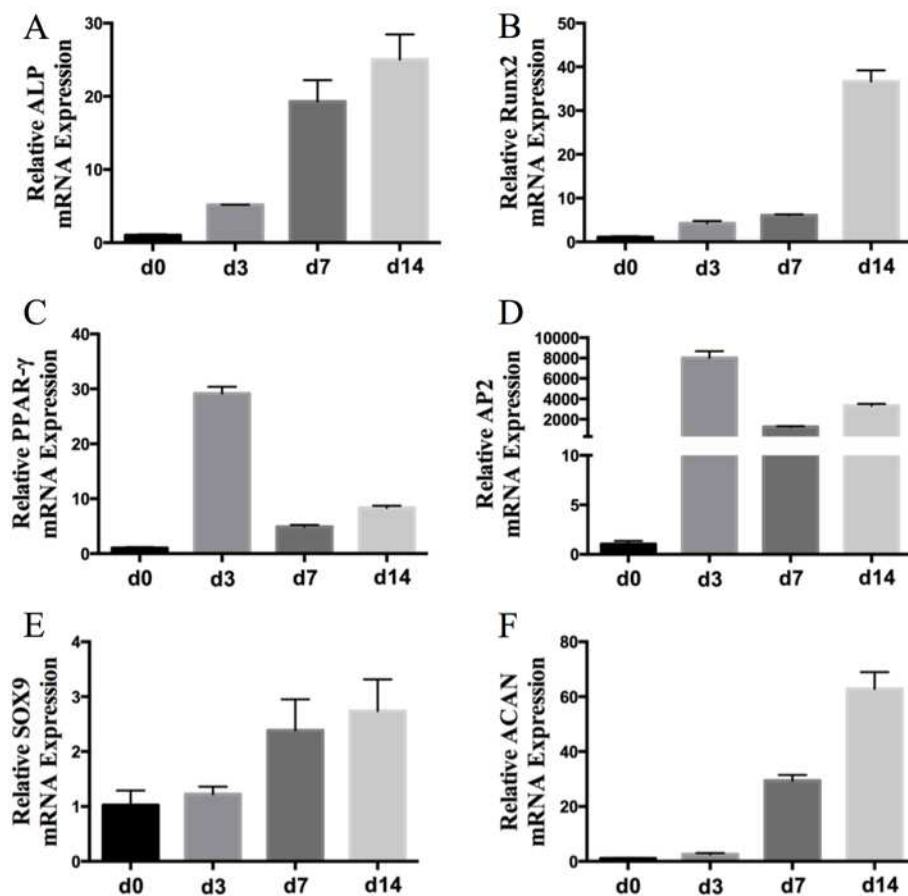

**Figure S2.** RT-qPCR analysis of tri-lineage induction of BMSCs. The relative expression levels of osteogenesis-specific genes: (A) ALP, and (B) Runx2; adipogenesis-specific genes: (C) PPAR- $\gamma$ , and (D) AP2; and chondrogenesis-specific genes: (E) Sox9, and (F) ACAN.



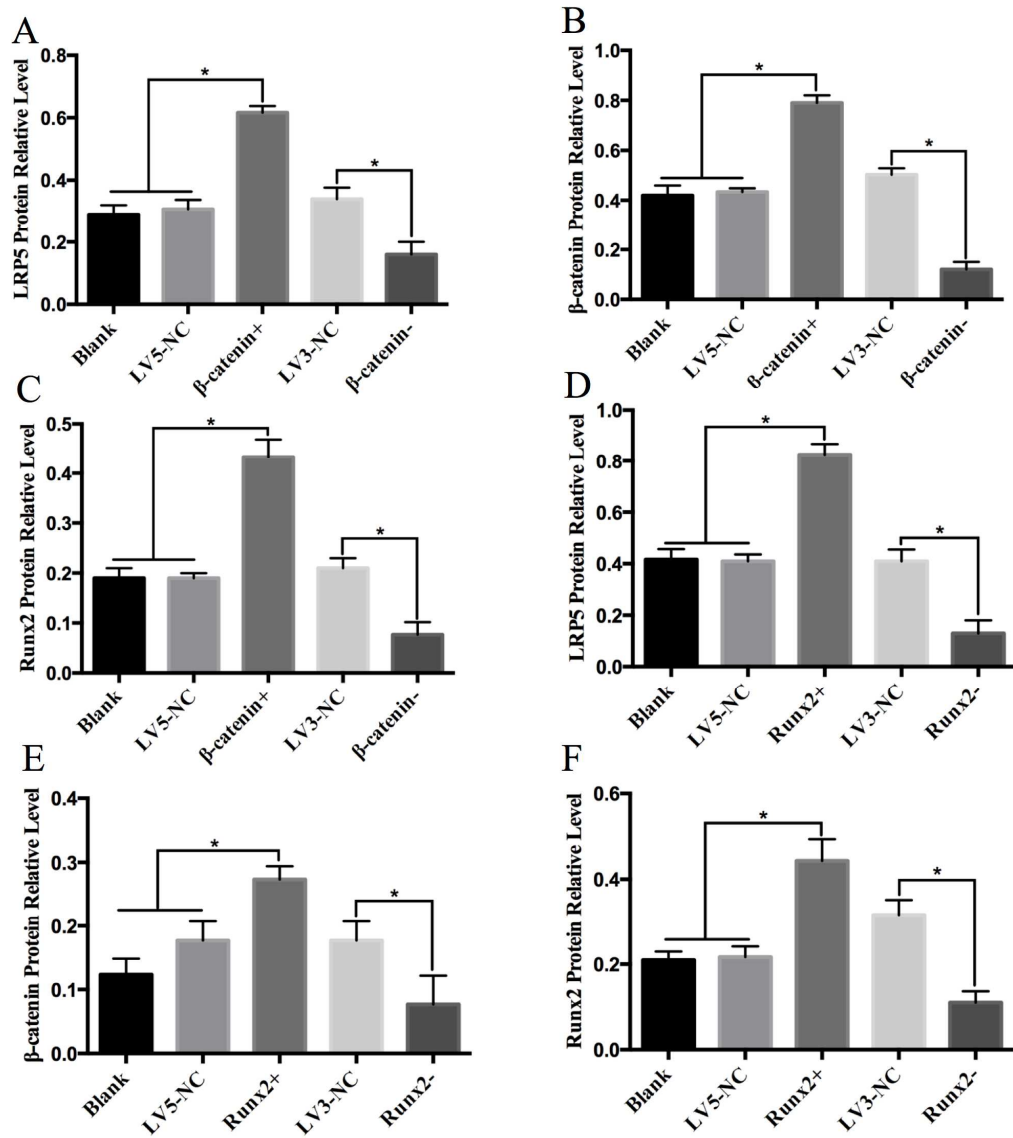

**Figure S3.** Western blot analysis of  $\beta$ -catenin, Runx2, and LRP5 regulatory loop. BMSCs are transfected with no agents (Blank), lentiviral vector 5 (LV5-NC), lentiviral vector overexpressing  $\beta$ -catenin ( $\beta$ -catenin+), lentiviral vector overexpressing Runx2 (Runx2+), lentiviral vector 3 (LV3-NC), lentiviral vector interfering with  $\beta$ -catenin ( $\beta$ -catenin-), and lentivirus vector interfering with Runx2 (Runx2-). Graphs show the semi-quantitative analysis of the western blot results of (A, D) LRP5, (B, E)  $\beta$ -catenin, and (C, F) Runx2 relative to  $\beta$ -actin. \* $P < 0.05$ .
